# Supplementary material for: Regional biogeography of microbiota composition in the Chagas disease vector Rhodnius pallescens
Source: PubMed Central journal article supplement (PMC6821009; doi:10.1186/s13071-019-3761-8), 2019-10-29

### 1. Trinidad de las Minas

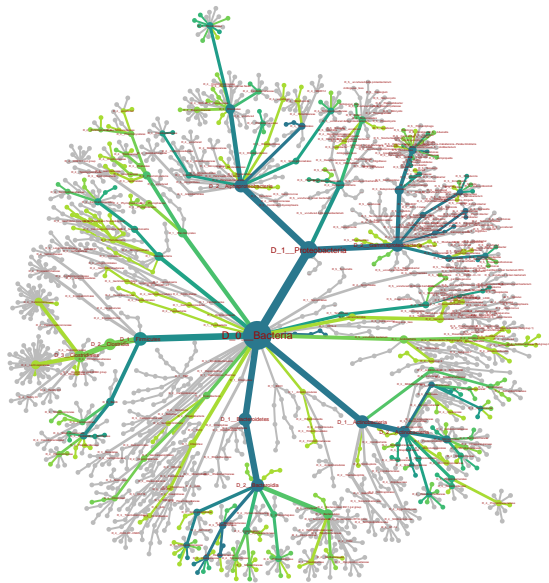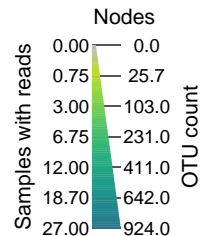

### 2. Las Pavas

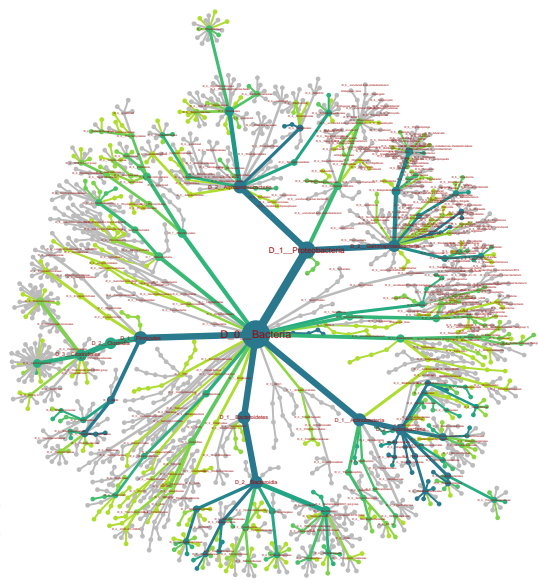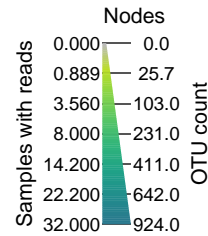

### 3. Veruaguas

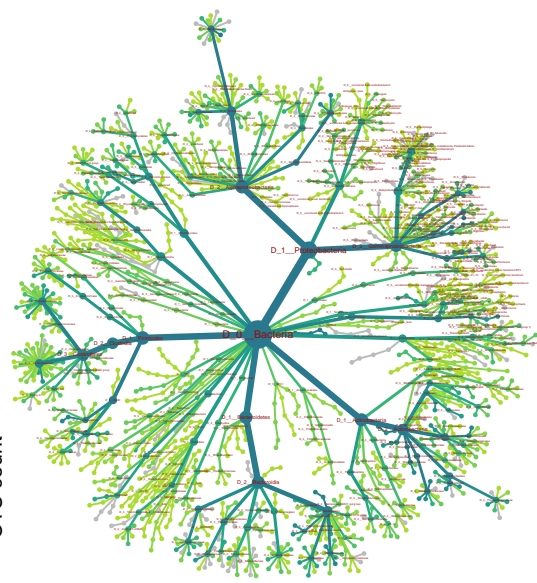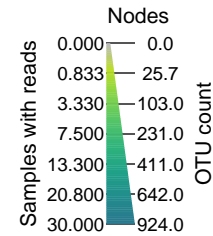

Supplement: 13071_2019_3761_MOESM3_ESM.pdf [file 13071_2019_3761_MOESM3_ESM.pdf]
